# Supplementary material for: Molecular epidemiologic study of citrin deficiency by screening for four reported pathogenic SLC25A13 variants in the Shaanxi and Guangdong provinces, China
Source: PubMed Central journal article supplement — Transl Pediatr. 2021 Jun;10(6):1658–67. doi: 10.21037/tp-21-58 (PMC8261583; doi:10.21037/tp-21-58), 2021-06
Supplement: tp-10-06-1658-dss.pdf [file tp-10-06-1658-dss.pdf]

## Data Sharing Statement

|                     |                                                                                                                                                     |                                                                                                                  |
|---------------------|-----------------------------------------------------------------------------------------------------------------------------------------------------|------------------------------------------------------------------------------------------------------------------|
| <b>Article Info</b> | http://dx.doi.org/10.21037/tp-21-58                                                                                                                 |                                                                                                                  |
| <b>Item</b>         | <b>Question</b>                                                                                                                                     | <b>Authors' Response<br/>(place "-" if not applicable)</b>                                                       |
| 1                   | Would you like to share data collected for your study to others?                                                                                    | Yes                                                                                                              |
| 2                   | If not, would you like to share the reason for your decision?                                                                                       | -                                                                                                                |
| 3                   | What data in particular will be shared?                                                                                                             | The data collected from Shaanxi and Guangdong provinces.                                                         |
| 4                   | Any other documents will be shared? Such as study protocol, statistical analysis plan, informed consent form, clinical study report, analytic code. | -                                                                                                                |
| 5                   | When will data availability begin?                                                                                                                  | From the publication date.                                                                                       |
| 6                   | When will data availability end?                                                                                                                    | Two years within the publication date.                                                                           |
| 7                   | To whom will you share the data?                                                                                                                    | Researchers who are interested in citrin deficiency.                                                             |
| 8                   | For what type of analysis or purpose?                                                                                                               | For investigation of the molecular epidemiological features of CD.                                               |
| 9                   | How or where can the data/documents be obtained?                                                                                                    | songyuanzong@vip.tom.com                                                                                         |
| 10                  | Any other restrictions?                                                                                                                             | We may balance the potential benefits and risks for each request and then provide the data that could be shared. |
